# Supplementary material for: Neoadjuvant Study of Niraparib in Patients With HER2-Negative, BRCA-Mutated Resectable Breast Cancer
Source: Research Square preprint supplement (doi:10.21203/rs.3.rs-711810/v1), 2021-08-06
Supplement: Supplementary file 1 [file 698fe4026b6623395a8b3e34.docx]

**Pilot Neoadjuvant Study of Niraparib in Patients With HER2-Negative, *BRCA*-Mutated Resectable Breast Cancer**

**Supplemental Material**

**Supplementary Table 1. Baseline patient demographics and characteristics**

**Supplementary Table 2. Summary of most common niraparib-related TEAEs (any grade, reported in ≥10% patients)**

**Supplementary Figure 1. Clinical and pathological response patient journeys by MRI**

**Supplementary Table 1. Baseline patient demographics and characteristics**

| **Characteristic** | **Total (N=21)** |
| --- | --- |
| Age, years |  |
| Median (min, max) | 43.0 (21, 73) |
| Age group, years, n (%) |  |
| <65 | 19 (90.5) |
| ≥65 | 2 (9.5) |
| Race, n (%) |  |
| White | 19 (90.5) |
| Black or African American | 1 (4.8) |
| Asian | 1 (4.8) |
| Body weight, kg |  |
| Median (min, max) | 68.0 (47, 110) |
| BMI, kg/m2 |  |
| Median (min, max) | 25.1 (18, 41) |
| ECOG PS score, n (%) |  |
| 0 | 20 (95.2) |
| 1 | 1 (4.8) |
| Stage at initial diagnosis, n (%) |  |
| I | 8 (38.1) |
| II | 10 (47.6) |
| III | 3 (14.3) |
| Histologic type, n (%) |  |
| Invasive ductal carcinoma | 20 (95.2) |
| Invasive lobular carcinoma | 1 (4.8) |
| *BRCA* mutation status, n (%) |  |
| *BRCA1* | 14 (66.7) |
| *BRCA2* | 6 (28.6) |
| *BRCA1* and *BRCA2*a | 1 (4.8) |
| Hormone receptor status, n (%) |  |
| TNBC | 15 (71.4) |
| ER-positive and/or PR-positive disease | 6 (28.6) |

aOne patient was positive for both *BRCA*1 and *BRCA*2 mutations.
BMI, body mass index; ECOG PS, Eastern Cooperative Oncology Group performance status; ER, estrogen receptor; PR, progesterone receptor; TNBC, triple-negative breast cancer.

**Supplementary Table 2. Summary of most common niraparib-related TEAEs (any grade, reported in ≥10% patients)**

| **Event, n (%)** | **Total (N=21)** | | |
| --- | --- | --- | --- |
| **Grade 1–2** | **Grade 3–4** | **Total**  **Any Gradea** |
| Any niraparib-related TEAE | 12 (57.1) | 7 (33.3) | 19 (90.5) |
| Nausea | 14 (66.7) | 0 | 14 (66.7) |
| Fatigue | 10 (47.6) | 0 | 10 (47.6) |
| Anemia | 2 (9.5) | 3 (14.3) | 5 (23.8) |
| Decreased appetite | 4 (19.0) | 0 | 4 (19.0) |
| Insomnia | 4 (19.0) | 0 | 4 (19.0) |
| Neutrophil count decreased | 1 (4.8) | 2 (9.5) | 3 (14.3) |
| White blood cell count decreased | 3 (14.3) | 0 | 3 (14.3) |

aNo Grade 5 TEAEs were reported.

TEAE, treatment-emergent adverse event.

**Supplementary Figure 1. Clinical and pathological response patient journeys by MRI**


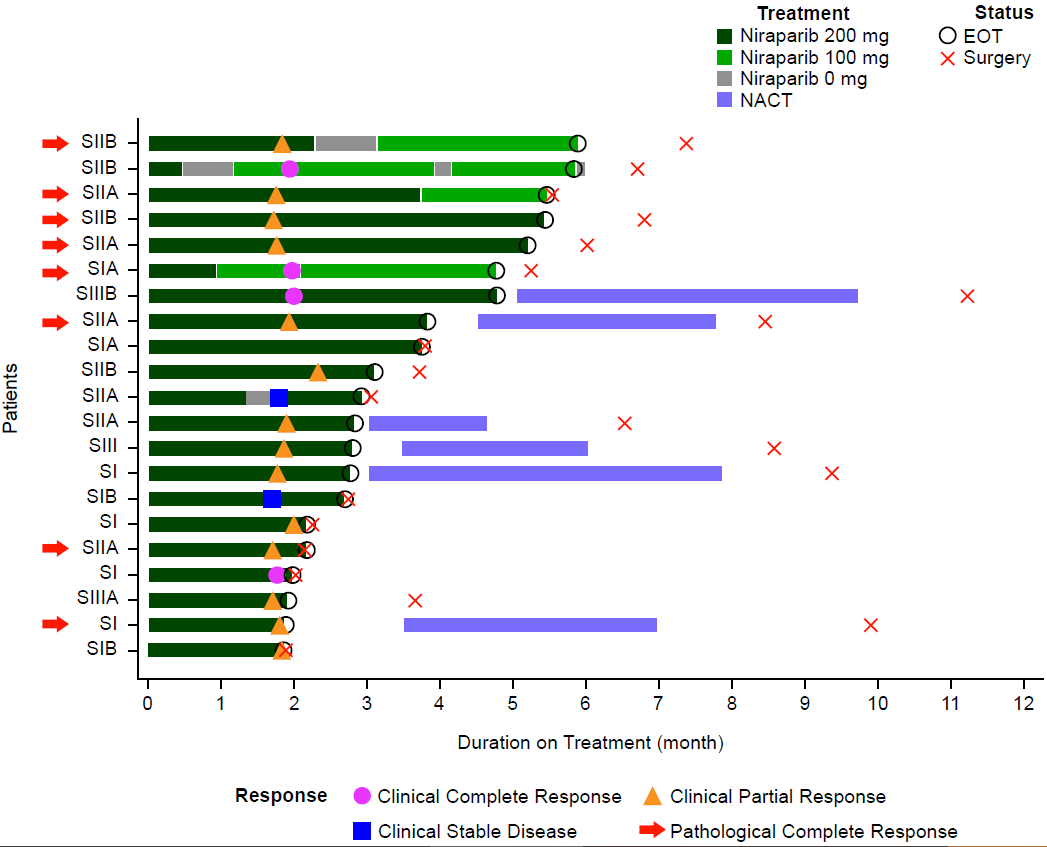


Red arrows indicated pCR. EOT, end of treatment; MRI, magnetic resonance imaging; NACT, neoadjuvant chemotherapy; pCR, pathological complete response; SI, Stage I; SII, Stage II; SIII; Stage III.
